# Supplementary material for: Dinuclear Au(i) N-heterocyclic carbene complexes derived from unsymmetrical azolium cyclophane salts: potential probes for live cell imaging applications
Source: Royal Society of Chemistry journal article supplement (doi:10.1039/c6dt01409g), 2016-01-01
Supplement: c6dt01409g2.pdf [file c6dt01409g2.pdf]

## Electronic Supplementary Information

# Dinuclear Au(I) N-heterocyclic carbene complexes derived from unsymmetrical azolium cyclophane salts: potential probes for live cell imaging applications

Louise E. Wedlock,<sup>a,b</sup> Peter J. Barnard,<sup>a,c</sup> Aleksandra Filipovska,<sup>a,d</sup> Brian W. Skelton,<sup>a,e</sup>  
Susan J. Berners-Price<sup>\*a,b</sup> and Murray V. Baker<sup>\*a,f</sup>

<sup>a</sup> School of Chemistry and Biochemistry M310, The University of Western Australia, Perth WA 6009, Australia. E-mail: murray.baker@uwa.edu.au.

<sup>b</sup> Institute for Glycomics, Griffith University, Gold Coast Campus, QLD 4222, Australia. Email: s.bernerns-price@griffith.edu.au.

<sup>c</sup> Department of Chemistry, La Trobe Institute of Molecular Science, La Trobe University, Bundoora, VIC 3086, Australia.

<sup>d</sup> Harry Perkins Institute for Medical Research, QEII Medical Centre, Nedlands WA 6009, Australia.

<sup>e</sup> Centre for Microscopy, Characterisation, and Analysis M310, The University of Western Australia, Perth, WA 6009, Australia.

<sup>f</sup> Department of Chemistry, National Dong Hwa University, Shoufeng, Hualien 97401, Taiwan, ROC.

### Table of Contents:

### Page

|                                                                                           |   |
|-------------------------------------------------------------------------------------------|---|
| Unit cell contents for the crystal structures of the azolium cyclophane salts             | 2 |
| Variable Temperature <sup>1</sup> H NMR Spectra for <b>III.2Br</b> and <b>V.2Br</b>       | 5 |
| Unit cell contents and packing diagrams for the crystal structures of the Au(I) complexes | 7 |

## Unit cell contents for the crystal structures of the azolium cyclophane salts

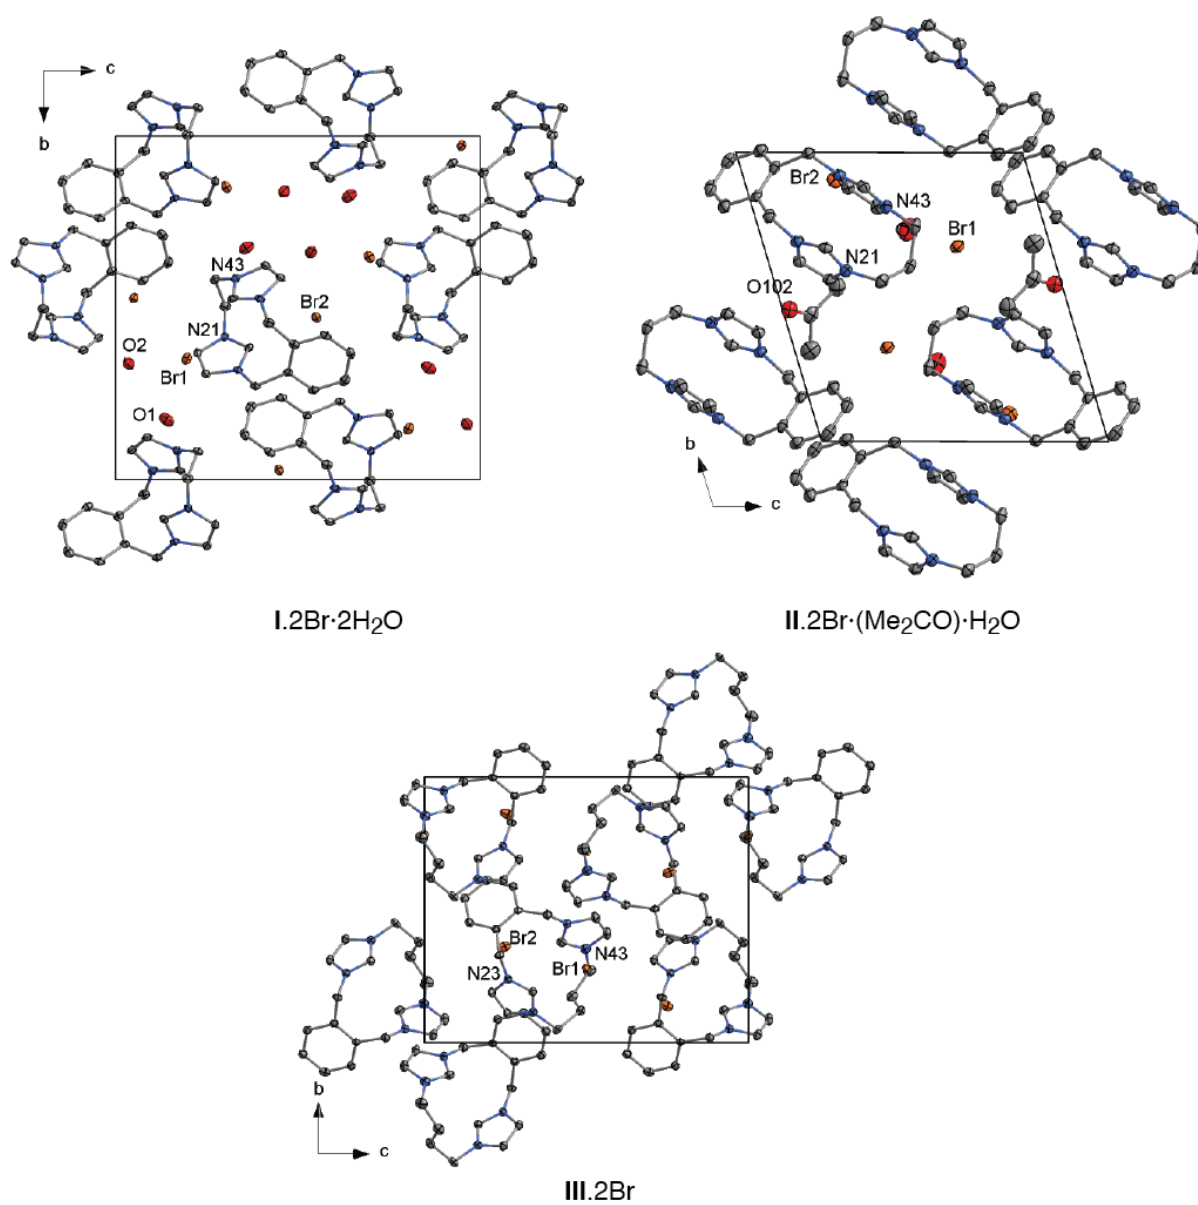

**Fig. S1** Unit Cell contents for the crystal structures of the imidazolium cyclophane compounds I.2Br·2H<sub>2</sub>O, II.2Br·(Me<sub>2</sub>CO)·H<sub>2</sub>O and III.2Br.

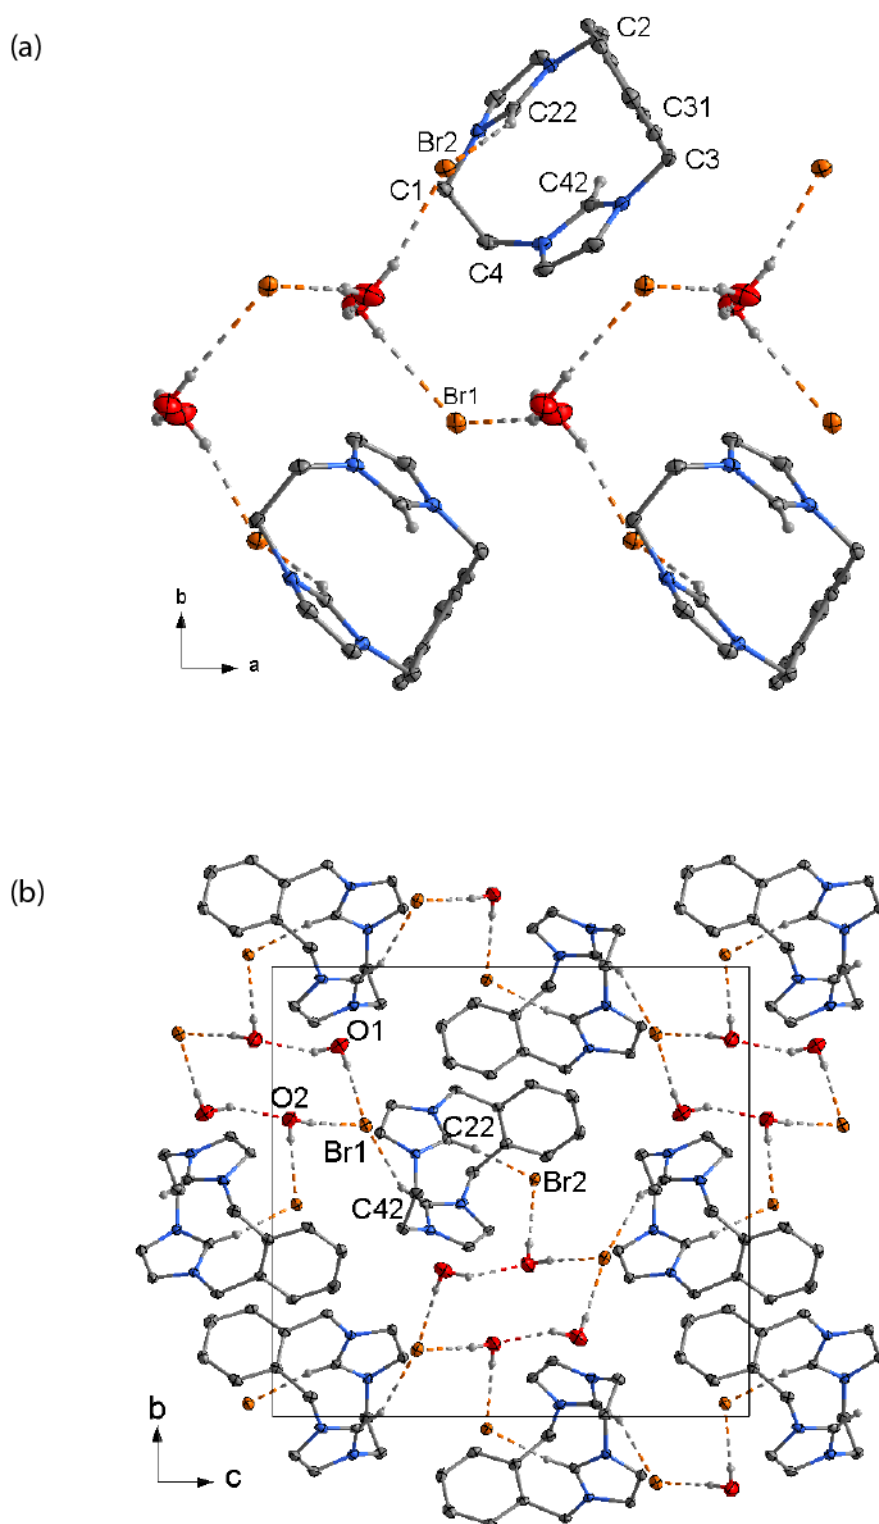

**Fig. S2** (a) structure of the one-dimensional hydrogen-bonded polymer formed by  $I_2Br \cdot 2H_2O$ , showing the interaction between H(22) and Br(2), and the hydrogen bonds between the water molecules and bromide ions; (b) the three-dimensional hydrogen-bonded polymer formed by the weak interaction between H(42) and Br(1) which links sheets of the one-dimensional polymer shown in (a).

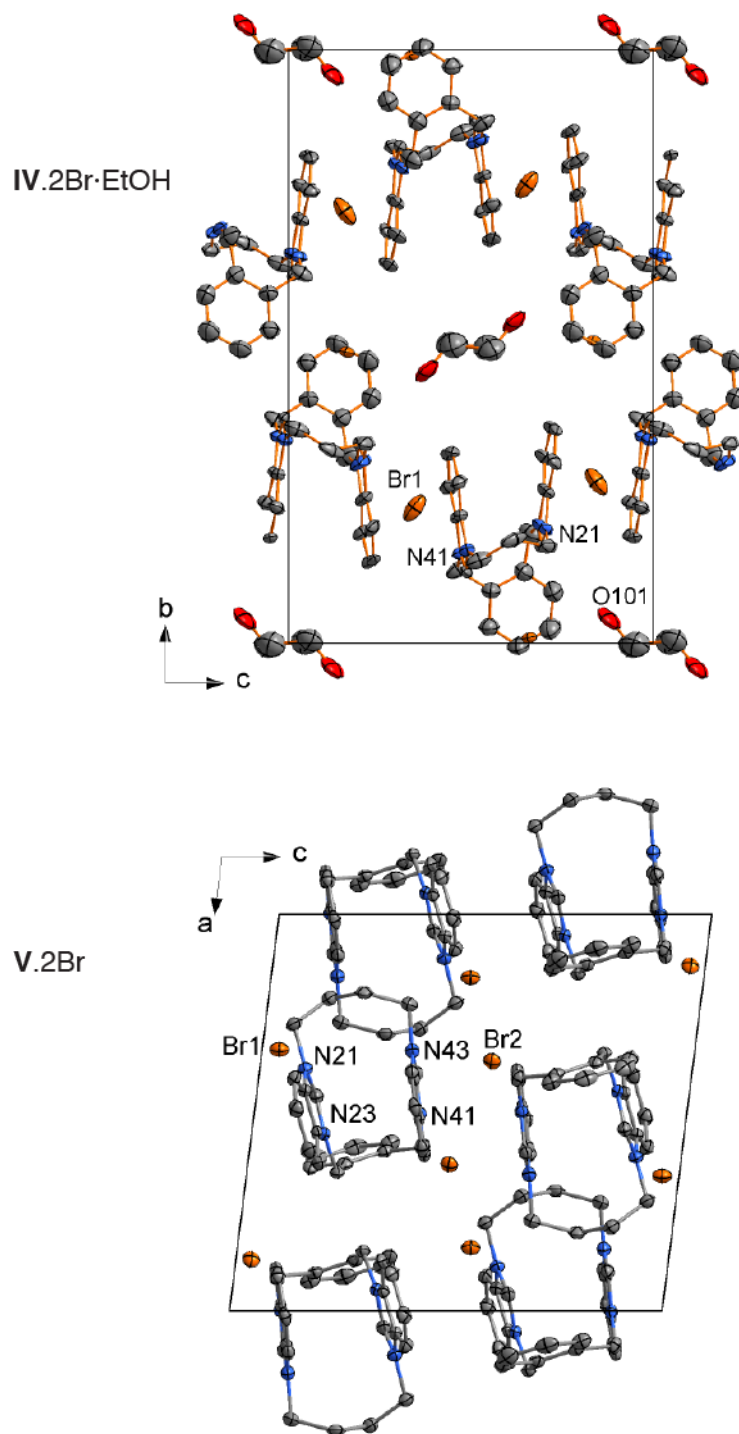

**Fig. S3** Unit cell contents for the benzimidazolium cyclophane compounds **IV.2Br·(EtOH)** and **V.2Br**. For **IV.2Br·(EtOH)**, ethanol (solvent) molecules are shown and significant twisting of the cation structure can be seen. For **V.2Br**, it is clearly shown that the benzimidazolium units of the cation **V**<sup>2+</sup> are not coplanar.

Variable Temperature  $^1\text{H}$  NMR Spectra for III.2Br and V.2Br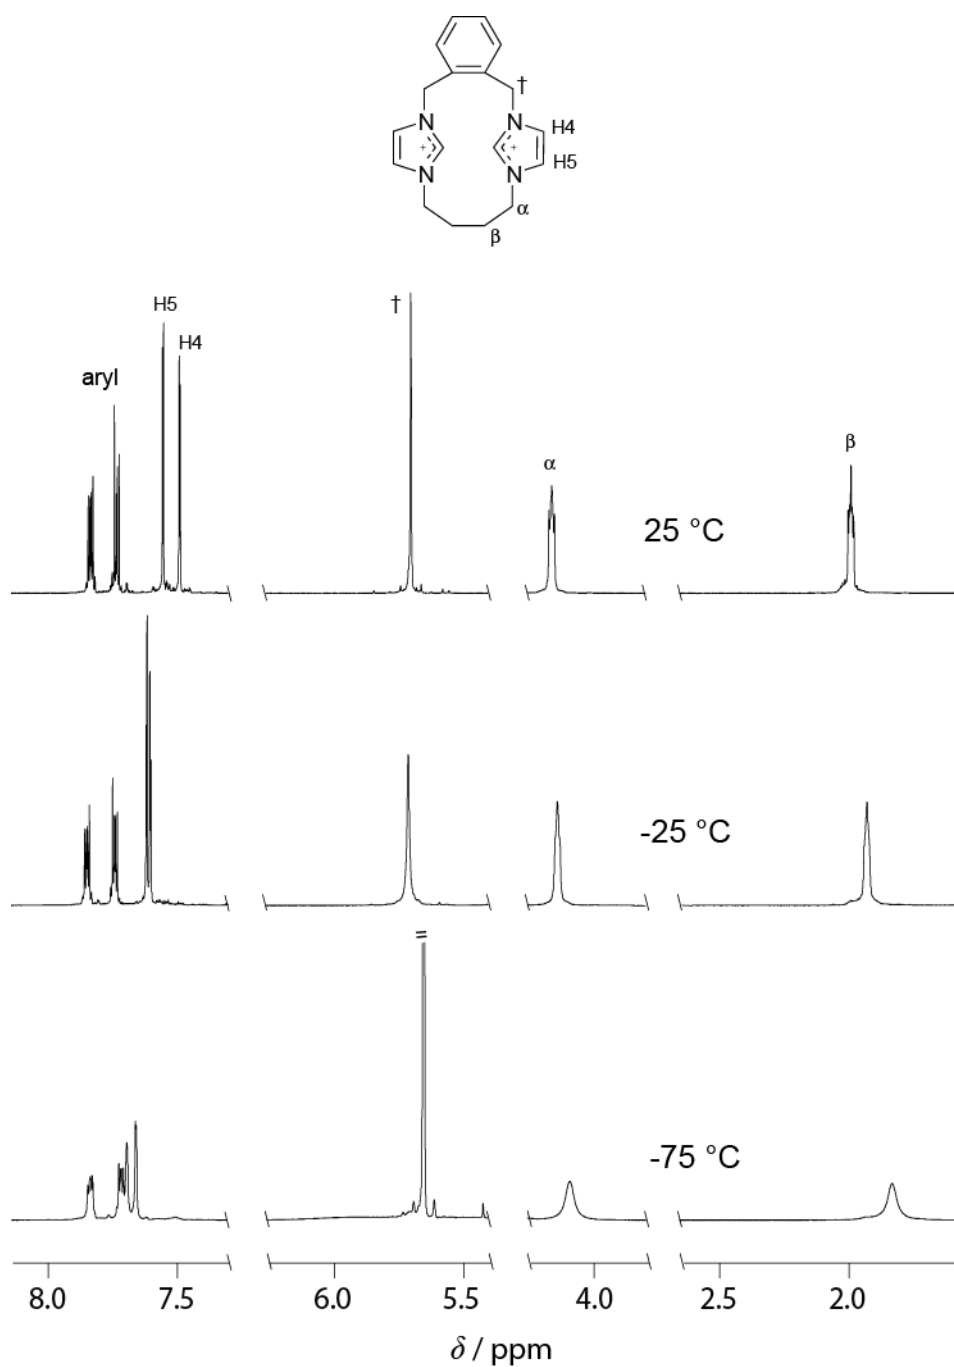

**Fig. S4**  $^1\text{H}$  NMR spectra (500.1 MHz,  $\text{CD}_3\text{OD}$ ) of III.2Br at 25, -25, and -75 °C. In the -75 °C spectrum, the signal due to the benzyl protons cropped for clarity.

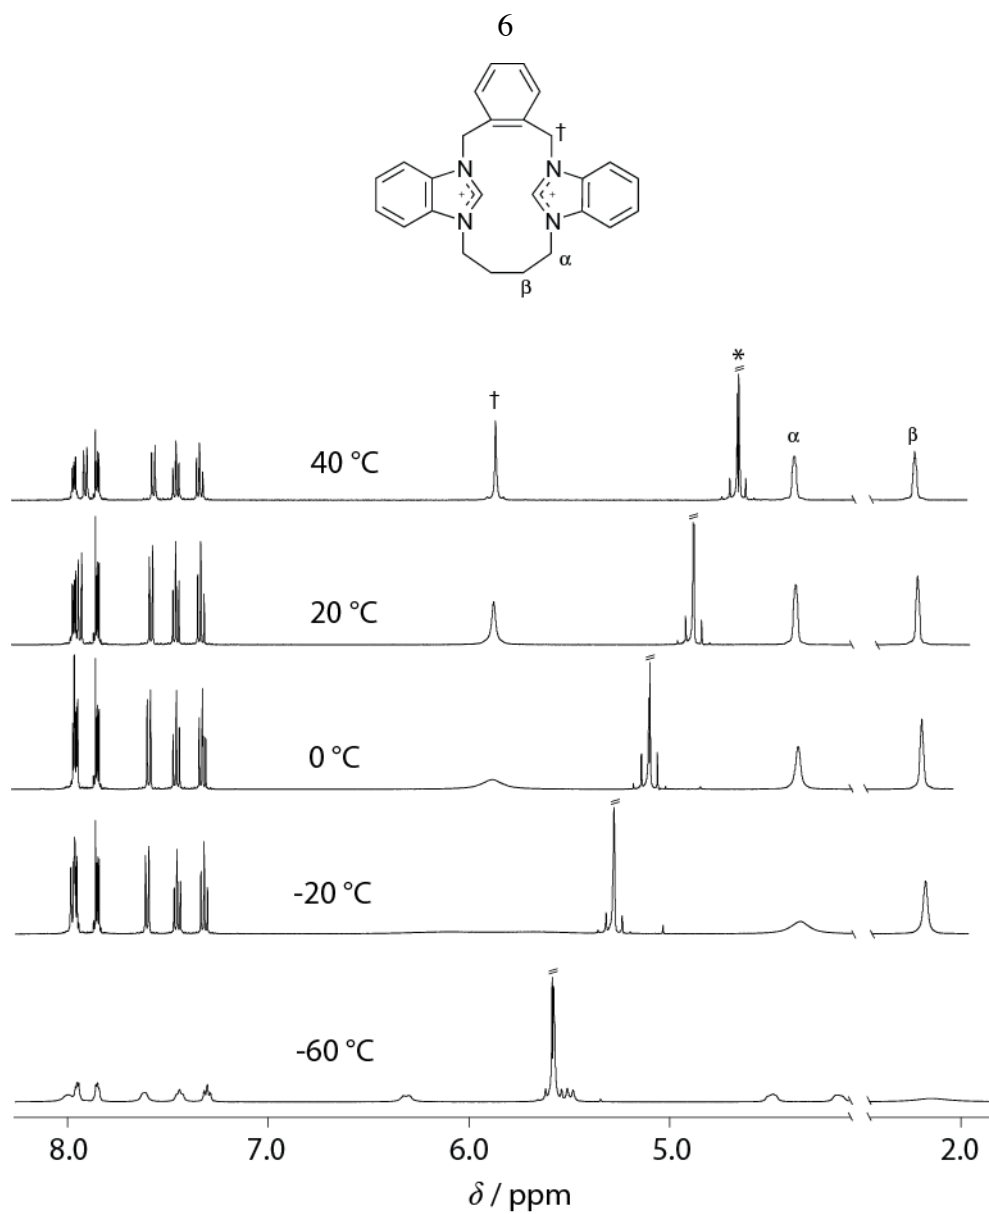

**Fig. S5**  $^1\text{H}$  NMR spectra (500.1 MHz,  $\text{CD}_3\text{OD}$ ) of **V.2Br** at 40, 20, 0, -20, and -60 °C. The signal due to adventitious water is labelled with an asterisk (\*) and has been cropped for clarity.

## Unit cell contents and packing diagrams for the crystal structures of the Au(I) complexes

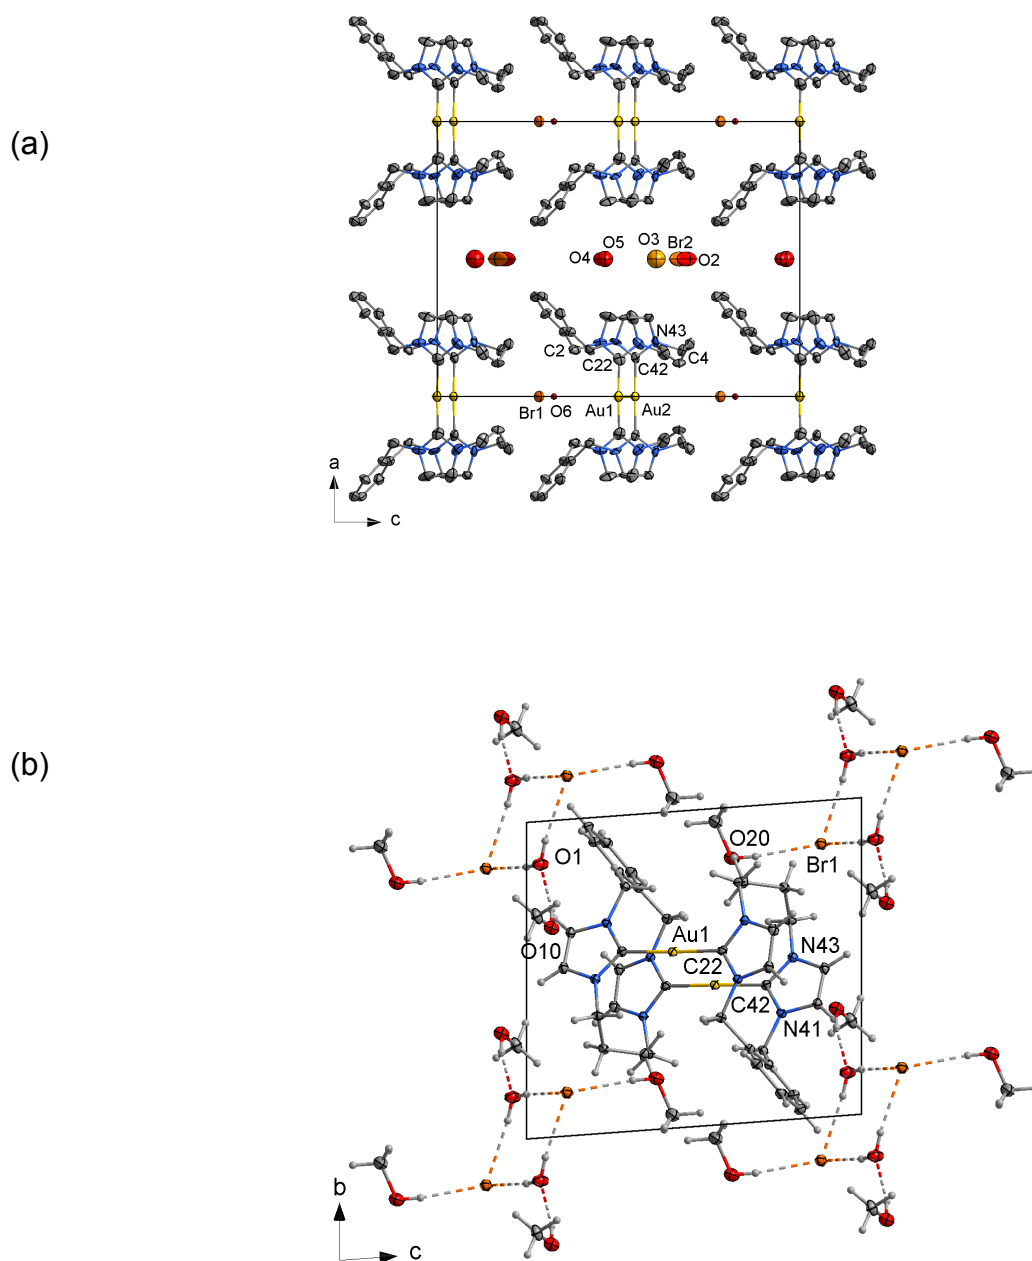

**Fig. S6** Unit cell contents for the Au(I) complexes bearing  $C_4$ -linked imidazolium-derived ligands, showing:

- (a) *cis-2*.BrCl. The cation  $cis-2^{2+}$  is situated on a crystallographic mirror plane perpendicular to the crystallographic  $a$  axis, and the cations lie parallel to the  $ac$  plane, alternating with planes containing counter ions and water molecules.
- (b) *trans-2*.BrCl. Solvent (methanol) and water molecules form a hydrogen bonded cluster around the cell origins.

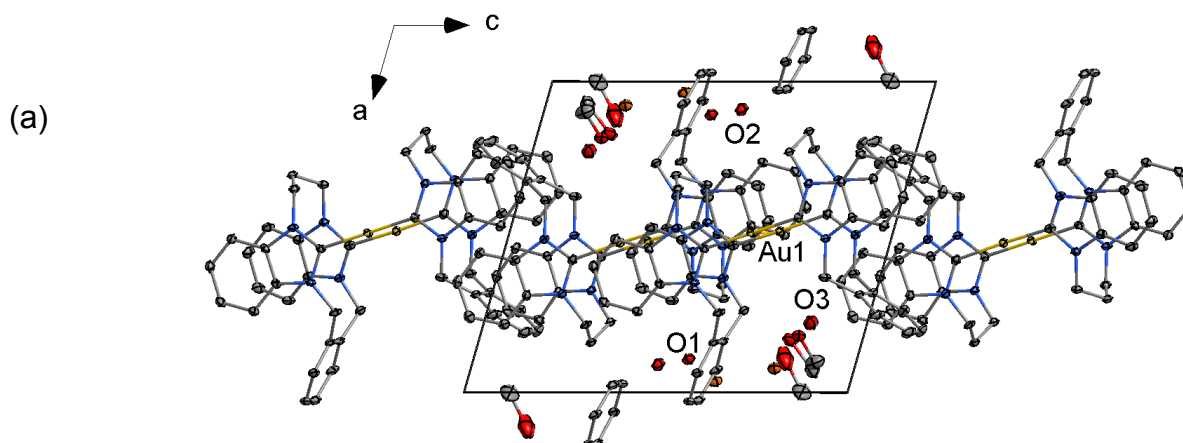

**Fig. S7** Unit cell contents for the Au(I) complexes bearing benzimidazolium-derived ligands.

(a) *cis*-**3**·2Br·2CH<sub>3</sub>OH·3H<sub>2</sub>O. The cations lie in sheets parallel to the *bc* plane, and alternate with sheets containing bromide ions, methanol and water molecules.

--- on next page ---

(b) *cis*-**4**·2Br·2CH<sub>3</sub>OH. Note the interaction between the Br(1) and the neighbouring Au(1) atoms of adjacent *cis*-**4**<sup>2+</sup> cations, which are related by a crystallographic two-fold along the *b* axis. The *cis*-**4**<sup>2+</sup> cations pack in layers perpendicular to the *a* axis, with pairs of cations arranged in a herringbone manner.

(c) *trans*-**4**·2Br·3CH<sub>3</sub>OH. The counter bromide ions are disordered over five sites in the structure, with the sum of their occupancy factors constrained to be 2.



Fig. S7(b)

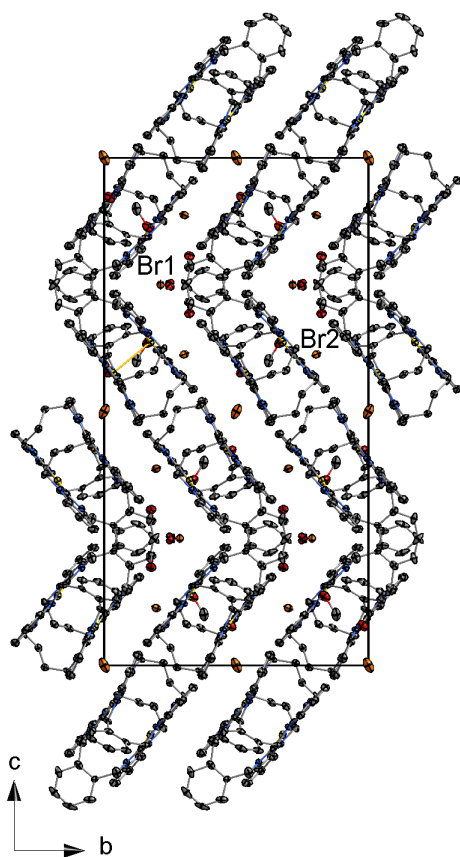

Fig. S7(c)

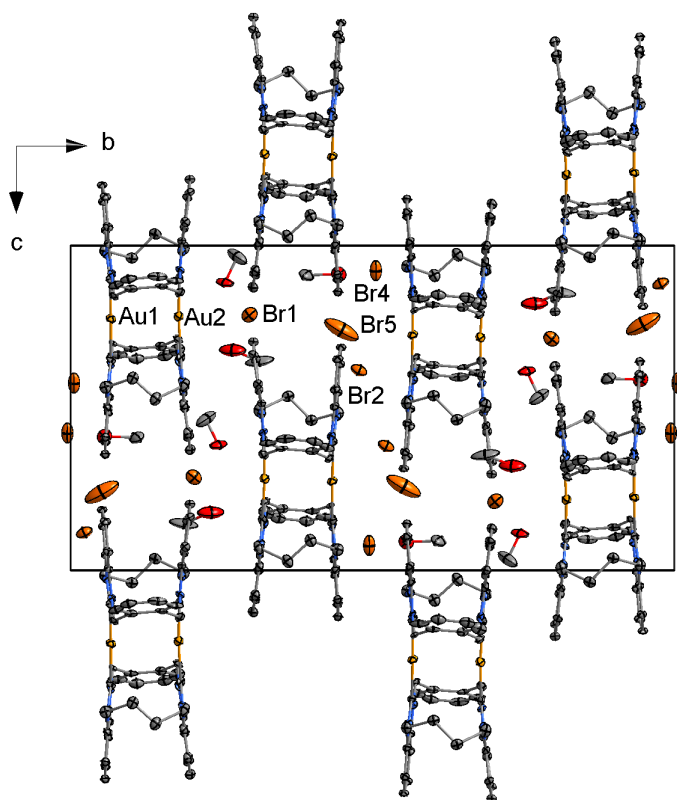

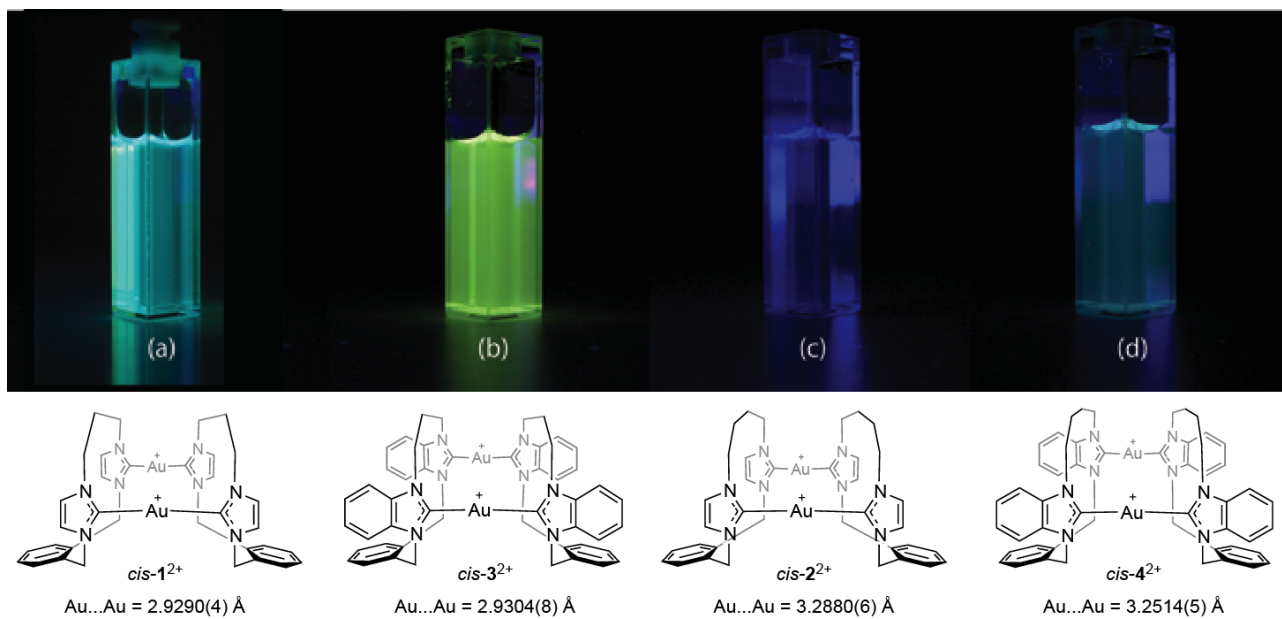

**Fig. S8** Aqueous solutions of halide salts of (a) *cis*-[1]<sup>2+</sup> (10 mM), (b) *cis*-[3]<sup>2+</sup> (1 mM), (c) *cis*-[2]<sup>2+</sup> (10 mM) and d) *cis*-[4]<sup>2+</sup> (10 mM), under irradiation with UV light (TLC lamp, 254 nm) and the corresponding intramolecular Au(I)...Au(I) distances for the dinuclear Au-NHC cations determined in the solid state.

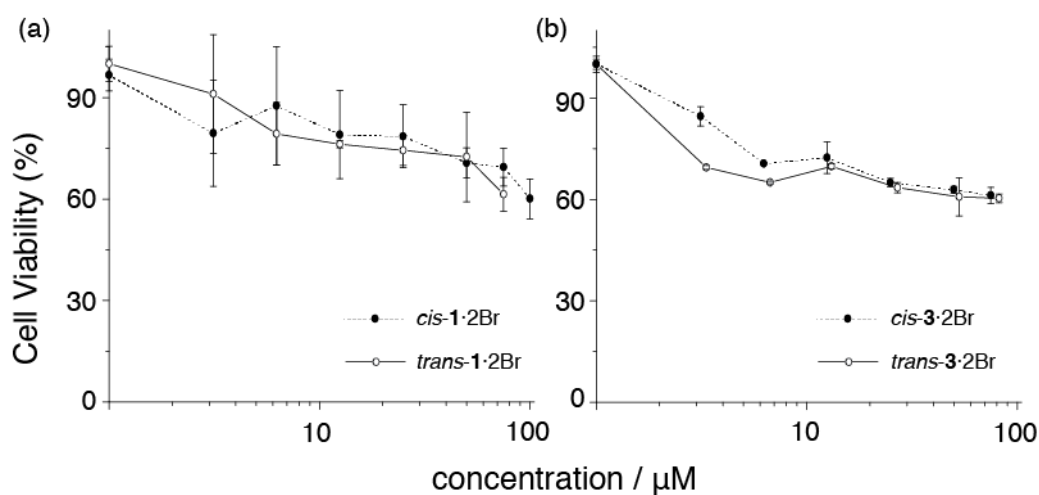

**Fig. S9** Viability of HeLa cells measured using a cell titre assay 24 h after treatment with various concentrations of (a) *cis*- or *trans*-1·2Br and (b) *cis*- or *trans*-3·2Br. Data are expressed relative to controls not treated with Au-NHC complexes and are means  $\pm$  SD of three independent experiments.

Movie S1 (separate file). Development of luminescence from MDA-MB-231 (MDA) breast cancer cells after treatment with *cis*-3·2Br (final concentration 26.2  $\mu\text{M}$ ). Cells were imaged using a luminescence microscope for 6 h (UV illumination, BP 340-380 nm filter, emission recorded via one image every 30 s, LP 425 nm filter).
